# Supplementary material for: Ambiphilic Hydrogen in Trisubstituted Silanes: Substituent- Driven Polarity Flip Confirmed by NMR
Source: Research Square preprint supplement (doi:10.21203/rs.3.rs-7574907/v1), 2025-09-29
Supplement: Supplementary file 1 [file 2c930d891d299c9160f87f1d.docx]

**Supplementary Information**

**Ambiphilic Hydrogen in Tri-substituted Silanes: Substituent- Driven Polarity Flip Confirmed by NMR**

P. Hobza et al.

**Figure S1.** The optimized geometries of silanes: a) SiH4, b) F3SiH, c) Cl3SiH, d) Br3SiH, e) (C6F5)3Si-H, f) (CF3)3SiH, g) (CN)3SiH, h) (NO2)3SiH, i) Ph3SiH, j) (iPr)3SiH, k) Me3SiH, l) Et3SiH, m) (Me3Si)3Si-H, n) (NH2)3SiH and o) (Me2N)3SiH. [C: grey, N: blue, H: white, Si: golden, O: red, F: cyan, Cl: green, Br: reddish-brown]

**Table S1** The calculated Mulliken, Natural Bond Orbital, Hirshfeld, ADCH and CM5 charges (in e) on the H and C atoms of X3C-H in various media at the PBE0-D3/def2-TZVPP level of theory. The extrema of the ESP on the molecular surface in the vicinity of H atom given in kcal/mol.

| X3C-H | Medium | Mulliken | | NBO | | Hirshfeld | | ADCH | | CM5 | | ESP |
| --- | --- | --- | --- | --- | --- | --- | --- | --- | --- | --- | --- | --- |
| H | C | H | C | H | C | H | C | H | C |
| (CF3)3CH | Gas | 0.128 | -0.171 | 0.277 | -0.500 | 0.072 | -0.065 | 0.151 | -0.172 | 0.138 | -0.100 | 40.57 |
| BEN | 0.148 | -0.154 | 0.294 | -0.505 | 0.084 | -0.062 | 0.171 | -0.166 | 0.151 | -0.096 | 46.29 |
| o-DCB | 0.163 | -0.142 | 0.308 | -0.509 | 0.094 | -0.059 | 0.186 | -0.161 | 0.160 | -0.093 | 50.77 |
| (CN)3CH | Gas | 0.156 | 0.428 | 0.328 | -0.493 | 0.113 | 0.077 | 0.204 | 0.125 | 0.175 | 0.040 | 57.39 |
| BEN | 0.173 | 0.483 | 0.355 | -0.502 | 0.131 | 0.087 | 0.238 | 0.140 | 0.193 | 0.050 | 66.91 |
| o-DCB | 0.187 | 0.520 | 0.375 | -0.508 | 0.145 | 0.095 | 0.266 | 0.152 | 0.207 | 0.058 | 74.36 |
| (NO2)3CH | Gas | 0.205 | -0.019 | 0.272 | 0.016 | 0.089 | 0.097 | 0.181 | -0.102 | 0.187 | 0.212 | 54.00 |
| BEN | 0.220 | 0.011 | 0.293 | 0.019 | 0.105 | 0.108 | 0.212 | -0.308 | 0.202 | 0.223 | 62.17 |
| o-DCB | 0.232 | 0.032 | 0.309 | 0.021 | 0.118 | 0.117 | 0.235 | -0.543 | 0.214 | 0.231 | 68.75 |
| (NH2)3CH | Gas | 0.077 | 0.153 | 0.138 | 0.243 | 0.021 | 0.078 | 0.073 | 0.229 | 0.107 | 0.175 | 8.63 |
| BEN | 0.086 | 0.113 | 0.122 | 0.246 | 0.013 | 0.075 | 0.079 | 0.274 | 0.096 | 0.172 | 12.71 |
| o-DCB | 0.093 | 0.110 | 0.129 | 0.246 | 0.019 | 0.075 | 0.093 | 0.305 | 0.103 | 0.171 | 15.69 |
| (Me2N)3CH | Gas | 0.055 | 0.097 | 0.155 | 0.282 | 0.021 | 0.091 | 0.060 | 0.156 | 0.114 | 0.204 | 8.79 |
| BEN | 0.068 | 0.124 | 0.161 | 0.278 | 0.025 | 0.090 | 0.067 | 0.165 | 0.117 | 0.203 | 10.35 |
| o-DCB | 0.076 | 0.099 | 0.163 | 0.280 | 0.026 | 0.090 | 0.070 | 0.179 | 0.119 | 0.202 | 11.30 |
| (Me3Si)3CH | Gas | 0.078 | 0.010 | 0.284 | -1.663 | 0.040 | -0.270 | 0.129 | -0.346 | 0.112 | -0.216 | 13.34 |
| BEN | 0.083 | 0.005 | 0.288 | -1.664 | 0.043 | -0.269 | 0.133 | -0.347 | 0.115 | -0.216 | 14.93 |
| o-DCB | 0.087 | 0.004 | 0.291 | -1.666 | 0.045 | -0.269 | 0.137 | -0.347 | 0.117 | -0.216 | 16.25 |

**Table S2** The calculated Mulliken, Natural Bond Orbital, Hirshfeld, ADCH and CM5 charges (in e) on the H and Al atoms of X2Al-H at the PBE0-D3/def2-TZVPP level of theory. The extrema of the ESP on the molecular surface in the vicinity of H atom given in kcal/mol.

| X2Al-H | Medium | Mulliken | | NBO | | Hirshfeld | | ADCH | | CM5 | | ESP |
| --- | --- | --- | --- | --- | --- | --- | --- | --- | --- | --- | --- | --- |
| H | Al | H | Al | H | Al | H | Al | H | Al |
| (CF3)2AlH | Gas | -0.091 | 0.507 | -0.369 | 1.298 | -0.124 | 0.560 | -0.083 | 0.442 | -0.046 | 0.428 | 7.19 |
| BEN |  |  |  |  |  |  |  |  |  |  |  |
| o-DCB |  |  |  |  |  |  |  |  |  |  |  |
| (CN)2AlH | Gas | -0.093 | 0.695 | -0.336 | 1.449 | -0.116 | 0.645 | -0.082 | 0.504 | -0.036 | 0.504 | 12.26 |
| BEN | -0.140 | 0.847 | -0.399 | 1.618 | -0.132 | 0.773 | -0.106 | 0.858 | -0.055 | 0.641 | 14.25 |
| o-DCB | -0.182 | 1.004 | -0.460 | 1.799 | -0.148 | 0.917 |  |  | -0.075 | 0.796 |  |
| (NO2)2AlH | Gas | -0.127 | 0.562 | -0.369 | 1.535 | -0.131 | 0.489 | -0.097 | 0.083 | -0.047 | 0.489 | 2.77 |
| BEN | -0.131 | 0.842 | -0.448 | 1.946 | -0.133 | 0.771 | -0.097 | 0.716 | -0.055 | 0.726 | 9.92 |
| o-DCB | -0.185 | 1.067 | -0.509 | 2.088 | -0.154 | 0.912 | -0.463 | 1.671 | -0.080 | 0.868 | 11.91 |
| (NH2)2AlH | Gas | -0.148 | 0.513 | -0.405 | 1.665 | -0.155 | 0.461 | -0.139 | 0.380 | -0.077 | 0.463 | -14.17 |
| BEN | -0.207 | 0.498 | -0.455 | 1.791 | -0.177 | 0.536 | -0.178 | 0.465 | -0.102 | 0.537 | -16.05 |
| o-DCB | -0.281 | 0.663 | -0.508 | 1.913 | -0.201 | 0.622 | -0.214 | 0.584 | -0.131 | 0.623 | -18.38 |
| (Me2N)2AlH | Gas | -0.141 | 0.338 | -0.399 | 1.660 | -0.152 | 0.450 | -0.144 | 0.359 | -0.074 | 0.451 | -13.34 |
| BEN | -0.207 | 0.498 | -0.455 | 1.791 | -0.177 | 0.536 | -0.178 | 0.465 | -0.102 | 0.537 | -16.05 |
| o-DCB | -0.281 | 0.663 | -0.508 | 1.913 | -0.201 | 0.622 | -0.214 | 0.585 | -0.131 | 0.623 | -18.3 |
| (Me3Si)2AlH | Gas | -0.131 | 0.301 | -0.389 | 0.797 | -0.168 | 0.297 | -0.130 | 0.211 | -0.097 | 0.229 | -15.33 |
| BEN |  |  |  |  |  |  |  |  |  |  |  |
| o-DCB |  |  |  |  |  |  |  |  |  |  |  |

**Table S3** The calculated Mulliken, Natural Bond Orbital, Hirshfeld, ADCH and CM5 charges (in e) on the H and P atoms of X2P-H at the PBE0-D3/def2-TZVPP level of theory. The extrema of the ESP on the molecular surface in the vicinity of H atom given in kcal/mol.

| X2P-H | Medium | Mulliken | | NBO | | Hirshfeld | | ADCH | | CM5 | | ESP |
| --- | --- | --- | --- | --- | --- | --- | --- | --- | --- | --- | --- | --- |
| H | P | H | P | H | P | H | P | H | P |
| (CF3)2PH | Gas | 0.056 | 0.049 | 0.009 | 0.373 | 0.015 | 0.106 | 0.095 | -0.023 | 0.101 | -0.035 | 25.59 |
| BEN | 0.070 | 0.060 | 0.025 | 0.380 | 0.026 | 0.117 | 0.118 | -0.015 | 0.113 | -0.025 | 30.02 |
| o-DCB | 0.081 | 0.068 | 0.03 | 0.386 | 0.035 | 0.126 | 0.137 | -0.008 | 0.122 | -0.016 | 33.69 |
| (CN)2PH | Gas | 0.080 | 0.248 | 0.042 | 0.571 | 0.038 | 0.259 | 0.110 | 0.209 | 0.123 | 0.111 | 35.67 |
| BEN | 0.096 | 0.284 | 0.062 | 0.586 | 0.053 | 0.286 | 0.135 | 0.254 | 0.139 | 0.139 | 42.73 |
| o-DCB | 0.109 | 0.315 | 0.079 | 0.600 | 0.066 | 0.309 | 0.156 | 0.289 | 0.151 | 0.162 | 48.68 |
| (NO2)2PH | Gas | 0.114 | 0.229 | 0.009 | 0.668 | 0.028 | 0.252 | 0.095 | 0.151 | 0.129 | 0.229 | 34.01 |
| BEN | 0.130 | 0.263 | 0.024 | 0.700 | 0.041 | 0.285 | 0.113 | 0.191 | 0.142 | 0.261 | 39.87 |
| o-DCB | 0.142 | 0.291 | 0.037 | 0.726 | 0.052 | 0.311 | 0.128 | 0.225 | 0.153 | 0.288 | 44.78 |
| (NH2)2PH | Gas | 0.004 | 0.170 | -0.086 | 0.882 | -0.025 | 0.096 | 0.080 | -0.083 | 0.070 | 0.065 | 1.63 |
| BEN | 0.003 | 0.145 | -0.089 | 0.861 | -0.029 | 0.075 | 0.092 | -0.126 | 0.065 | 0.045 | 2.95 |
| o-DCB | 0.009 | 0.130 | -0.085 | 0.843 | -0.027 | 0.061 | 0.105 | -0.163 | 0.066 | 0.030 | 3.45 |
| (Me2N)2PH | Gas | -0.025 | 0.135 | -0.105 | 0.916 | -0.034 | 0.116 | 0.059 | -0.093 | 0.057 | 0.088 | 0.94 |
| BEN | -0.017 | 0.113 | -0.098 | 0.900 | -0.031 | 0.101 | 0.074 | -0.134 | 0.061 | 0.073 | 1.57 |
| o-DCB | -0.009 | 0.095 | -0.092 | 0.887 | -0.028 | 0.089 | 0.087 | -0.167 | 0.064 | 0.060 | 2.26 |
| (Me3Si)2PH | Gas | 0.023 | -0.252 | 0.033 | -0.445 | -0.008 | -0.134 | 0.058 | -0.245 | 0.078 | -0.216 | 6.17 |
| BEN | 0.023 | -0.254 | 0.033 | -0.449 | -0.008 | -0.137 | 0.073 | -0.307 | 0.077 | -0.219 | 6.58 |
| o-DCB | 0.041 | -0.362 | 0.044 | -0.506 | -0.005 | -0.176 | 0.085 | -0.362 | 0.081 | -0.258 | 6.81 |

**Table S4** The calculated Mulliken, Natural Bond Orbital, Hirshfeld, ADCH and CM5 charges (in e) on the H and Ge atoms of X3Ge-H in the gas phase at the PBE0-D3/def2-TZVPP level of theory. The extrema of the ESP on the molecular surface in the vicinity of H atom given in kcal/mol.

| X3Ge-H | Mulliken | | NBO | | | Hirshfeld | | ADCH | | CM5 | | | ESP | |
| --- | --- | --- | --- | --- | --- | --- | --- | --- | --- | --- | --- | --- | --- | --- |
| H | Ge | H | Ge | H | | Ge | H | Ge | H | Ge |  | |
| GeH4 | -0.018 | 0.071 | -0.113 | 0.452 | -0.063 | | 0.251 | -0.029 | 0.115 | -0.004 | 0.014 | 2.07 | |
| F3GeH | 0.006 | 1.003 | -0.214 | 2.174 | -0.002 | | 0.691 | 0.040 | 0.667 | 0.062 | 0.656 | 28.33 | |
| Cl3GeH | 0.040 | 0.739 | -0.131 | 1.221 | -0.021 | | 0.430 | 0.042 | 0.286 | 0.042 | 0.329 | 20.50 | |
| Br3GeH | 0.049 | 0.673 | -0.118 | 0.914 | -0.024 | | 0.347 | 0.046 | 0.176 | 0.038 | 0.196 | 18.69 | |
| (C6F5)3Ge-H | 0.056 | 0.405 | -0.096 | 1.279 | -0.045 | | 0.355 | -0.013 | 0.460 | 0.021 | 0.257 | 10.72 | |
| (CF3)3GeH | 0.069 | 0.089 | -0.104 | 0.888 | -0.026 | | 0.327 | 0.034 | 0.185 | 0.038 | 0.244 | 23.14 | |
| (CN)3GeH | 0.102 | 0.350 | -0.058 | 1.128 | -0.002 | | 0.523 | 0.055 | 0.348 | 0.062 | 0.433 | 36.19 | |
| (NO2)3GeH | 0.082 | 0.628 | -0.108 | 1.301 | 0.010 | | 0.510 | 0.070 | 0.271 | 0.079 | 0.602 | 38.69 | |
| Ph3GeH | -0.020 | 0.365 | -0.147 | 1.325 | -0.072 | | 0.328 | -0.050 | 0.565 | -0.012 | 0.221 | -3.38a/  -5.25 | |
| (iPr)3GeH | -0.047 | 0.229 | -0.178 | 1.335 | -0.084 | | 0.321 | -0.075 | 0.246 | -0.025 | 0.196 | -7.11a/  -7.99 | |
| Me3GeH | -0.053 | 0.329 | -0.178 | 1.327 | -0.087 | | 0.344 | -0.076 | 0.280 | -0.028 | 0.211 | -6.60a/  -7.20 | |
| Et3GeH | -0.052 | 0.265 | -0.181 | 1.326 | -0.087 | | 0.329 | -0.081 | 0.253 | -0.028 | 0.199 | -7.29a/  -7.71 | |
| (Me3Ge)3GeH | -0.032 | -0.145 | -0.079 | -0.205 | -0.076 | | 0.024 | -0.026 | -0.099 | -0.016 | -0.040 | -5.12a/  -6.80 | |
| (NH2)3GeH | -0.057 | 0.529 | -0.217 | 1.758 | -0.077 | | 0.423 | -0.056 | 0.502 | -0.012 | 0.513 |  | |
| (Me2N)3GeH | -0.038 | 0.330 | -0.206 | 1.828 | -0.070 | | 0.432 | -0.050 | 0.427 | -0.004 | 0.536 |  | |

a The *V*s,min of H atom on the extension of Ge-H.

**Table S5** The calculated Mulliken, Natural Bond Orbital, Hirshfeld, ADCH and CM5 charges (in e) on the H and Sn atoms of X3Sn-H in the gas phase at the PBE0-D3/def2-TZVPP level of theory. The extrema of the ESP on the molecular surface in the vicinity of H atom given in kcal/mol.

| X3Sn-H | Mulliken | | NBO | | Hirshfeld | | ADCH | | | CM5 | | | ESP |
| --- | --- | --- | --- | --- | --- | --- | --- | --- | --- | --- | --- | --- | --- |
| H | Sn | H | Sn | H | Sn | H | Sn | H | | Sn |  | |
| SnH4 | -0.118 | 0.470 | -0.166 | 0.662 | -0.079 | 0.314 | -0.053 | 0.211 | -0.032 | | 0.127 | -0.024a/  -0.829 | |
| F3SnH | -0.066 | 1.426 | -0.240 | 2.318 | -0.001 | 0.823 | 0.037 | 0.814 | 0.050 | | 0.867 | 31.14 | |
| Cl3SnH | -0.072 | 1.054 | -0.161 | 1.430 | -0.023 | 0.533 | 0.041 | 0.403 | 0.026 | | 0.504 | 22.10 | |
| Br3SnH | -0.069 | 0.938 | -0.148 | 1.149 | -0.029 | 0.436 | 0.045 | 0.275 | 0.019 | | 0.356 | 19.28 | |
| (C6F5)3SnH | -0.064 | 0.931 | -0.144 | 1.414 | -0.053 | 0.439 | -0.021 | 0.381 | -0.002 | | 0.417 | 10.54 | |
| (CF3)3SnH | -0.066 | 0.421 | -0.157 | 0.985 | -0.041 | 0.412 | 0.012 | 0.277 | 0.008 | | 0.398 | 19.69 | |
| (CN)3SnH | -0.045 | 1.071 | -0.109 | 1.336 | -0.014 | 0.639 | 0.036 | 0.419 | 0.037 | | 0.620 | 34.66 | |
| (NO2)3SnH | -0.031 | 0.921 | -0.165 | 1.391 | -0.006 | 0.600 | 0.044 | 0.507 | 0.045 | | 0.754 | 34.29 | |
| Ph3SnH | -0.132 | 0.973 | -0.197 | 1.427 | -0.086 | 0.395 | -0.069 | 0.579 | -0.039 | | 0.361 | -4.71a/  -5.51 | |
| (iPr)3SnH | -0.146 | 0.698 | -0.224 | 1.361 | -0.102 | 0.376 | -0.105 | 0.307 | -0.056 | | 0.324 | -9.24a/  -9.54 | |
| Me3SnH | -0.160 | 0.851 | -0.224 | 1.347 | -0.102 | 0.410 | -0.104 | 0.352 | -0.056 | | 0.347 | -8.23a/  -8.49 | |
| Et3SnH | -0.160 | 0.786 | -0.229 | 1.338 | -0.104 | 0.389 | -0.112 | 0.320 | -0.058 | | 0.331 | -9.37a/  -9.54 | |
| (Me3Sn)3SnH | -0.118 | -0.149 | -0.120 | -0.179 | -0.090 | 0.038 | -0.041 | -0.096 | -0.044 | | -0.009 | -6.64a/  -7.57 | |
| (NH2)3SnH | -0.155 | 1.042 | -0.255 | 1.837 | -0.086 | 0.513 | -0.071 | 0.568 | -0.038 | | 0.690 | 1.20a/  1.11 | |
| (Me2N)3SnH | -0.125 | 0.995 | -0.236 | 1.920 | -0.073 | 0.521 | -0.051 | 0.519 | -0.023 | | 0.718 | 0.05 | |

a The *V*s,min of H atom on the extension of Sn-H.

**Table S6** The calculated Mulliken, Natural Bond Orbital, Hirshfeld, ADCH and CM5 charges (in e) on the H and Pb atoms of X3Pb-H in the gas phase at the PBE0-D3/def2-TZVPP level of theory. The extrema of the ESP on the molecular surface in the vicinity of H atom given in kcal/mol.

| X3Pb-H | Mulliken | | NBO | | Hirshfeld | | ADCH | | | CM5 | | | ESP | |
| --- | --- | --- | --- | --- | --- | --- | --- | --- | --- | --- | --- | --- | --- | --- |
| H | Pb | H | Pb | H | Pb | | H | Pb | | H | Pb | |  |
| PbH4 | -0.109 | 0.434 | -0.124 | 0.498 | -0.062 | 0.245 | | -0.045 | 0.181 | | -0.026 | 0.106 | | 0.70a/  -0.25 |
| F3PbH | -0.016 | 1.371 | -0.138 | 2.142 | 0.058 | 0.794 | | 0.100 | 0.814 | | 0.097 | 0.879 | | 42.78 |
| Cl3PbH | -0.038 | 1.016 | -0.085 | 1.313 | 0.022 | 0.520 | | 0.088 | 0.421 | | 0.059 | 0.542 | | 30.08 |
| Br3PbH | -0.044 | 0.914 | -0.083 | 1.052 | 0.010 | 0.424 | | 0.086 | 0.287 | | 0.045 | 0.401 | | 25.71 |
| (C6F5)3PbH | -0.066 | 0.871 | -0.102 | 1.260 | -0.027 | 0.397 | | -0.007 | 0.291 | | 0.010 | 0.431 | | 14.88 |
| (CF3)3PbH | -0.062 | 0.298 | -0.119 | 0.813 | -0.023 | 0.351 | | 0.021 | 0.246 | | 0.013 | 0.383 | | 19.13 |
| (CN)3PbH | -0.012 | 0.943 | -0.044 | 1.198 | 0.026 | 0.601 | | 0.072 | 0.388 | | 0.065 | 0.634 | | 41.21 |
| (NO2)3PbH | -0.050 | 0.840 | -0.151 | 1.128 | -0.005 | 0.519 | | 0.035 | 0.452 | | 0.030 | 0.673 | | 27.94 |
| Ph3PbH | -0.123 | 0.821 | -0.159 | 1.248 | -0.067 | 0.339 | | -0.061 | 0.560 | | -0.032 | 0.359 | | -3.51a/  -4.36 |
| (iPr)3PbH | -0.155 | 0.611 | -0.203 | 1.153 | -0.095 | 0.313 | | -0.115 | 0.292 | | -0.062 | 0.315 | | -10.91a/  -11.11 |
| Me3PbH | -0.154 | 0.753 | -0.191 | 1.151 | -0.087 | 0.351 | | -0.103 | 0.338 | | -0.054 | 0.341 | | -8.04a/  -8.30 |
| Et3PbH | -0.164 | 0.695 | -0.204 | 1.135 | -0.094 | 0.328 | | -0.120 | 0.310 | | -0.061 | 0.324 | | -10.46a/  -10.58 |
| (Me3Pb)3PbH |  |  |  |  |  |  | |  |  | |  |  | |  |
| (NH2)3PbH | -0.130 | 0.930 | -0.197 | 1.611 | -0.054 | 0.465 | | -0.047 | 0.543 | | -0.018 | 0.667 | | 6.24 |
| (Me2N)3PbH | -0.109 | 0.892 | -0.185 | 1.698 | -0.045 | 0.472 | | -0.034 | 0.534 | | -0.008 | 0.693 | | 3.49 |

a The *V*s,min of H atom on the extension of Pb-H.

**Materials**

Tris(pentafluorophenyl)silane (TPFPS), triphenylsilane (TPS, 97%), triethylsilane (TES, 99 %), tetramethylsilane (TMS, >99%), and benzene-D6 (99.6 atom% D) were purchased from Sigma Aldrich (Merck). 1,1,1,3,3,3-Hexamethyl-2-(trimethylsilyl)trisilane (tris(trimethylsilyl)silane, TTMSS, 95% (stabilized with 0.05 % TBBPA)) was purchased from BLDpharm. 1,2-Dichlorobenzene-D4 (o-DCB-D4, 98 atom% D) was purchased from Fisher Scientific. All the materials were used directly without additional purification.

**Sample preparation**

With the exception of tris(pentafluorophenyl)silane, 50 µmol of the silane of interest was dissolved in 700 µL of deuterated solvent and placed into the 5mm NMR tube (Wilmad®, >400 MHz) and capped. Tris(pentafluorophenyl)silane, was poorly soluble in both tested media; therefore, the tests were conducted with 4 µmol (2 mg) of the compound, resulting in only partial dissolution in all of the tested solvents. To the prepared sample of triphenylsilane in benzene-D6, a small amount of TMS was added for referencing.

**NMR measurements and data processing**

NMR measurements were performed using a JEOL spectrometer JNM-ECZ400R with a superconducting coil having a magnetic field of 9.4 T (working frequency: 399.8 MHz for 1H) equipped with a 5 mm liquid probe. The samples, spinning at 15 Hz, were measured under ambient temperature (20 °C) using a simple single pulse job for proton NMR measurement at 45 ° pulse angle with a relaxation delay of 5 s. Magnetic shim coils were adjusted automatically or manually along the Z1, Z2, Z3, and Z4 axes. After the measurements, the acquired spectra were processed and visualized using MestReNova software. First, zero- and first-order phase corrections were applied to the acquired spectra, followed by referencing with respect to solvent reference shifts: benzene-D5 proton signal in benzene-D6 to 7.16 ppm, and H4 proton signal of *o*-DCB to 6.94 ppm. In the case of the triphenylsilane spectrum measured in benzene-D6, the referencing was done with respect to tetramethylsilane (0 ppm) due to the overlap of the solvent reference signal with the signal from triphenylsilane. The Si-H proton signal was recognized according to the presence of a doublet signal caused by 1J-coupling of 29Si-1H nuclei with 1JSi-H constant ranging from 150 to 260 Hz, appearing as intense sidebands along the main 28Si-1H signal (singlet or heptet depending on the presence of other interacting 1H or 19F nuclei). The chemical shift positions and 1JSi-H constants for all the tested silanes in various solvents are summarized in Table S7.

**Table S7** Chemical shifts and 1J 29Si-1H coupling constants of the tested silanes in both tested solvents.

| solvent | silane | | | | | | | |
| --- | --- | --- | --- | --- | --- | --- | --- | --- |
| **TPFPS** | | **TTMSS** | | **TES** | | **TPS** | |
| δ (ppm) | 1JSi-H (Hz) | δ (ppm) | 1JSi-H (Hz) | δ (ppm) | 1JSi-H (Hz) | δ (ppm) | 1JSi-H (Hz) |
| Benz.-D6 | 5.81 | 252.0 | 2.54 | 153.9 | 3.90 | 177.5 | 5.71 | 197.9 |
| oDCB-D4 | 5.95 | 252.4 | 2.31 | 154.2 | 3.69 | 177.5 | 5.50 | 198.4 |

**NMR data**


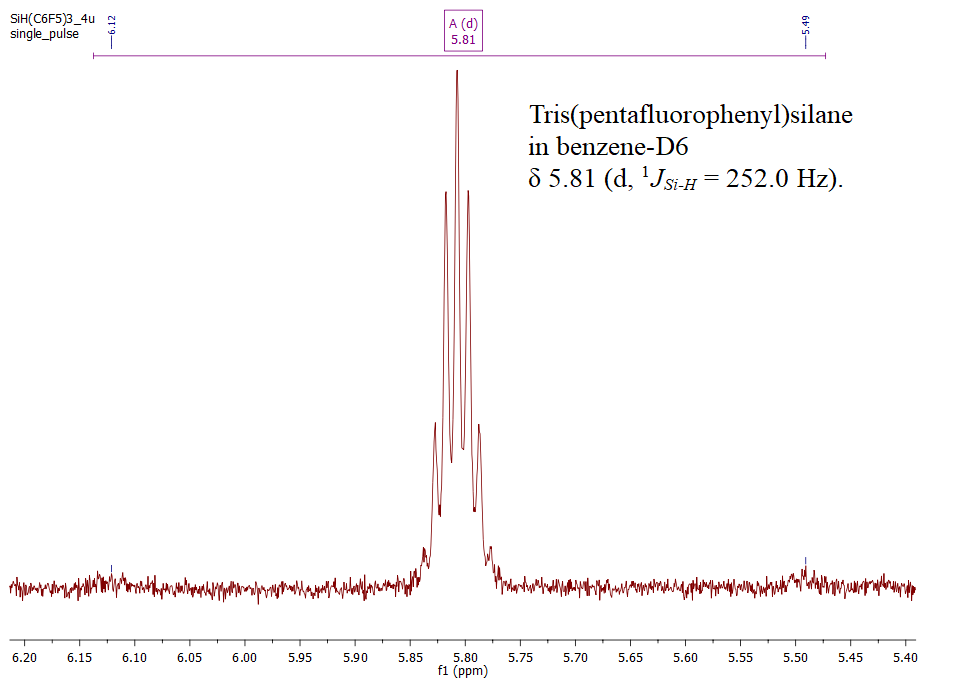

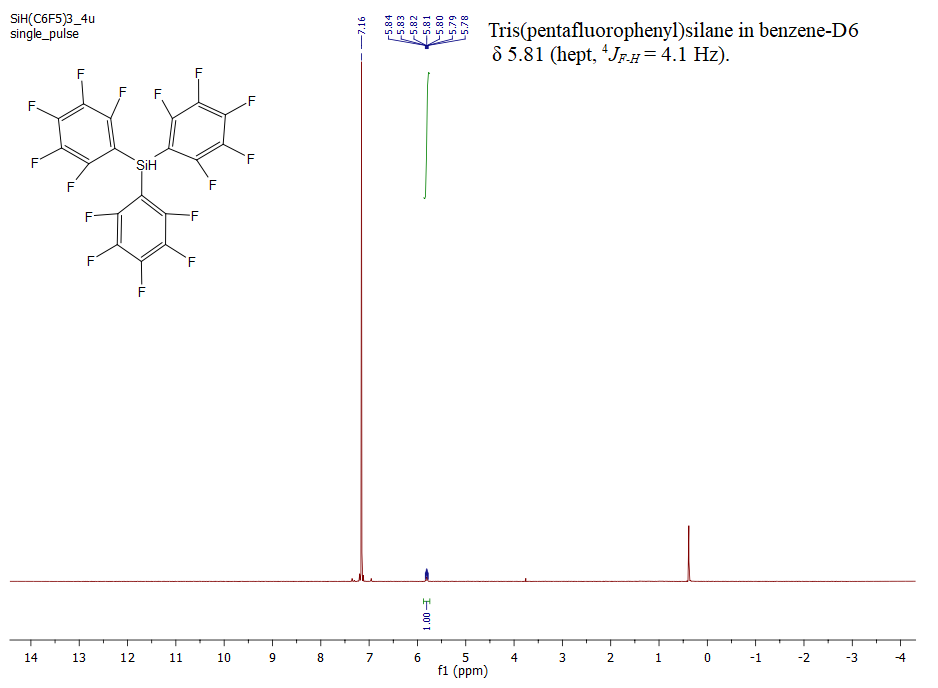


**Figure S2** 1H NMR spectrum of tris(pentafluorophenyl)silane in benzene-D6 with the magnified region of the Si‑H proton signal in the inset.


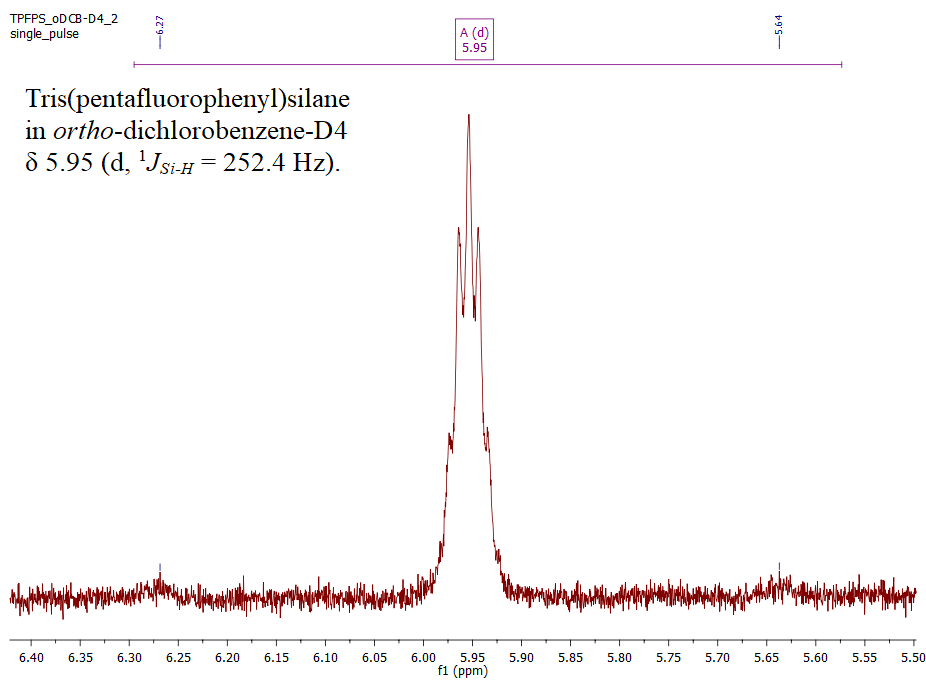

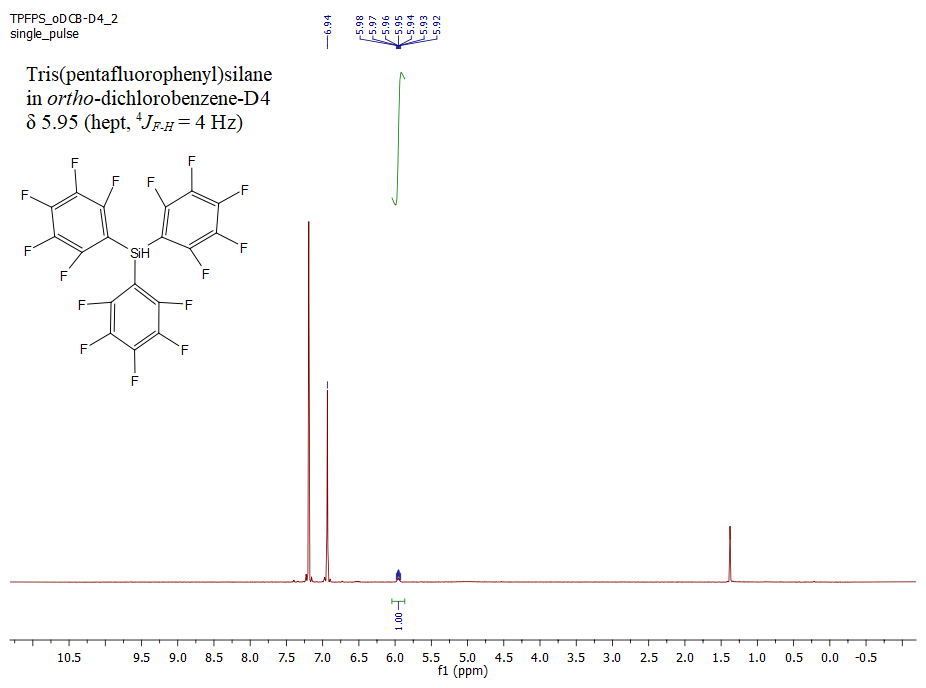


**Figure S3** 1H NMR spectrum of tris(pentafluorophenyl)silane in oDCB-D4 with the magnified region of the Si‑H proton signal in the inset.


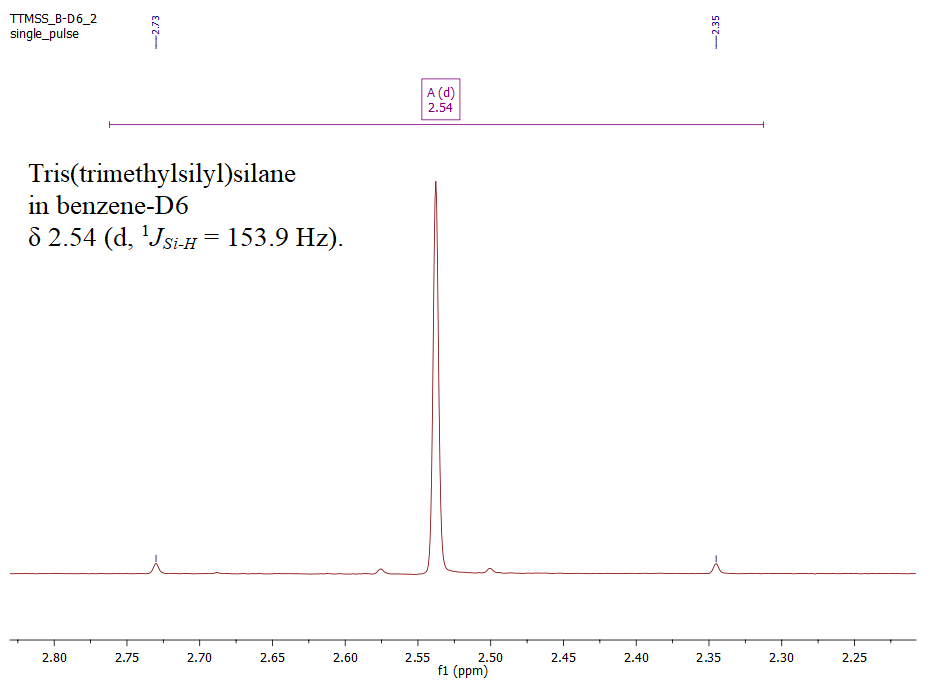

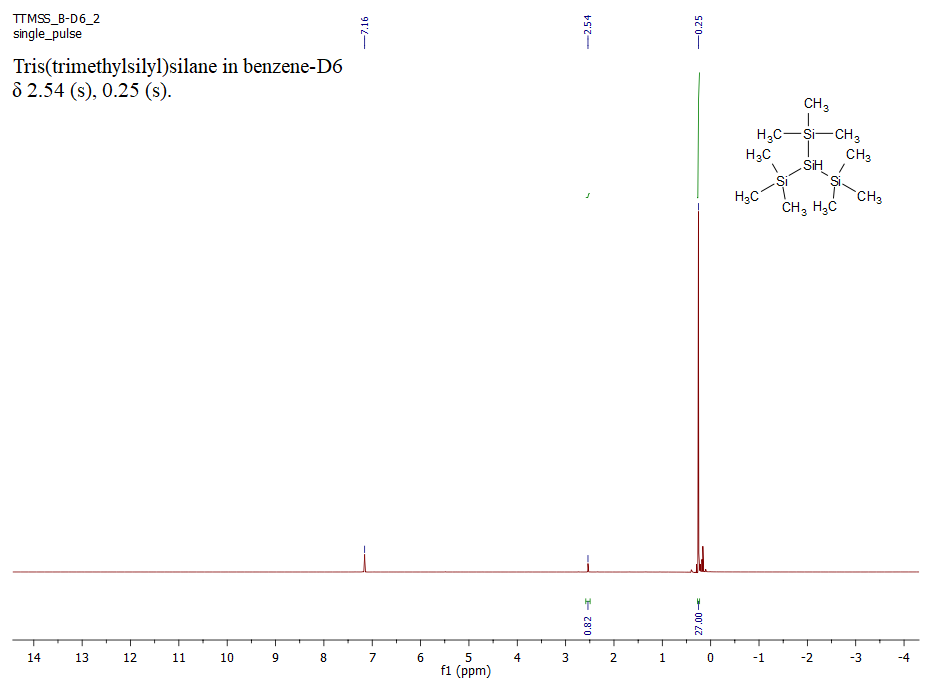


**Figure S4** 1H NMR spectrum of tris(trimethylsilyl)silane in benzene-D6 with the magnified region of the Si‑H proton signal in the inset.


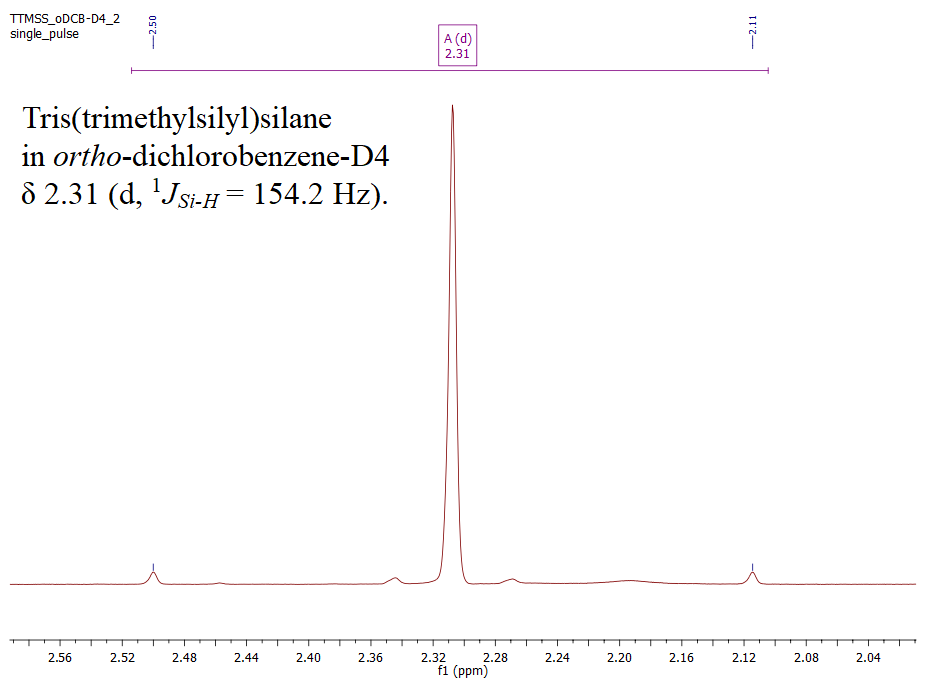

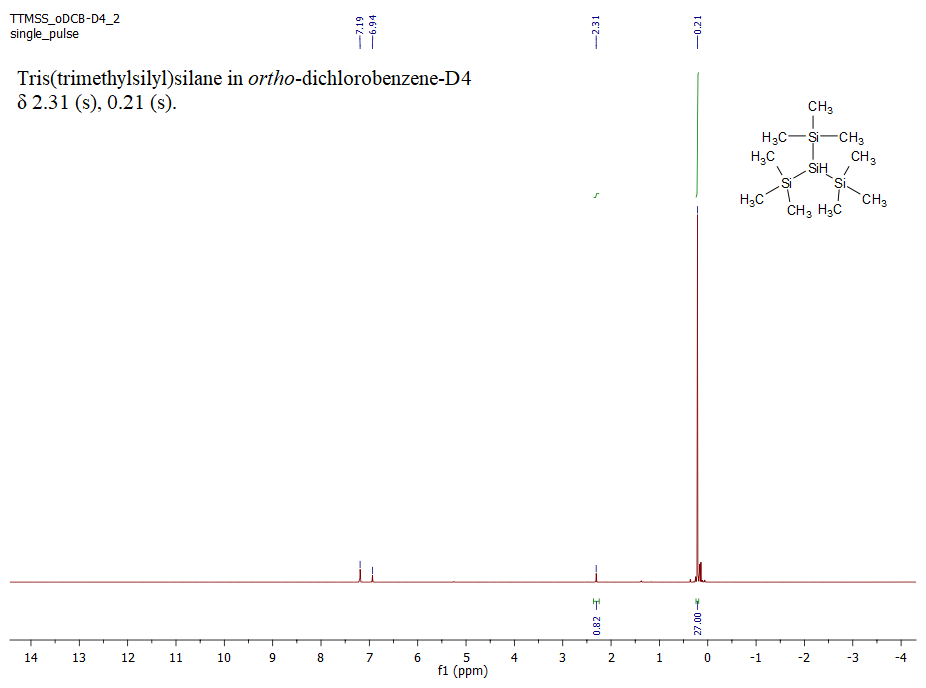


**Figure S5** 1H NMR spectrum of tris(trimethylsilyl)silane in oDCB-D4 with the magnified region of the Si‑H proton signal in the inset.


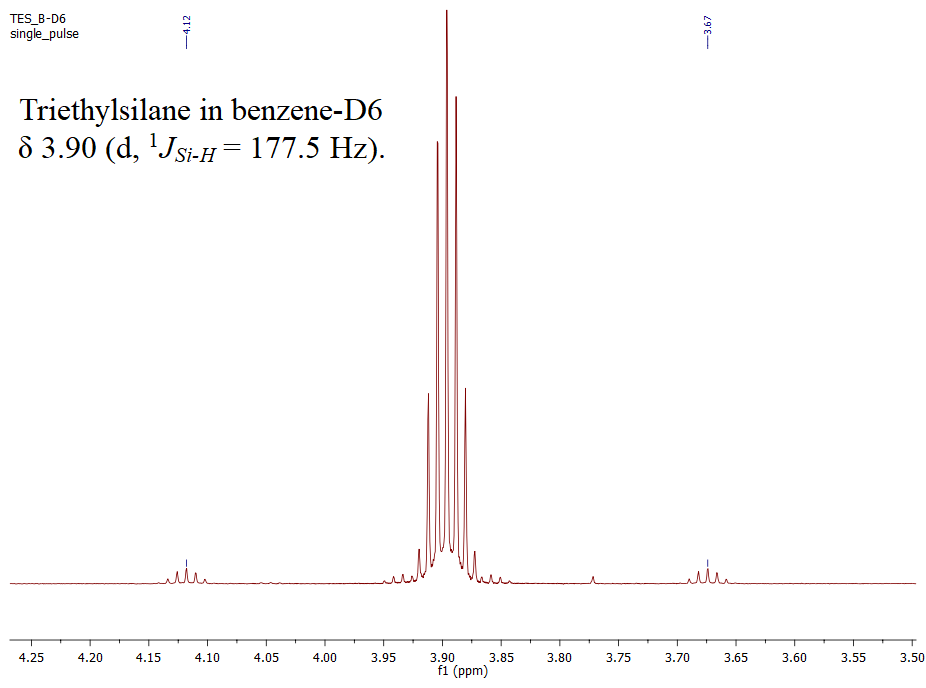

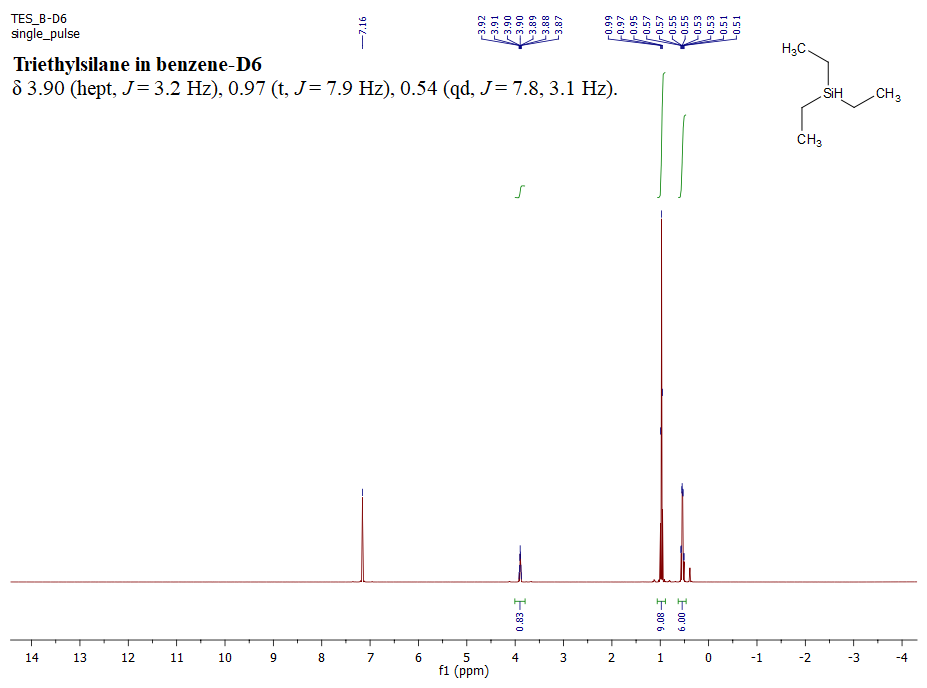


**Figure S6** 1H NMR spectrum of triethylsilane in benzene-D6 with the magnified region of the Si‑H proton signal in the inset.


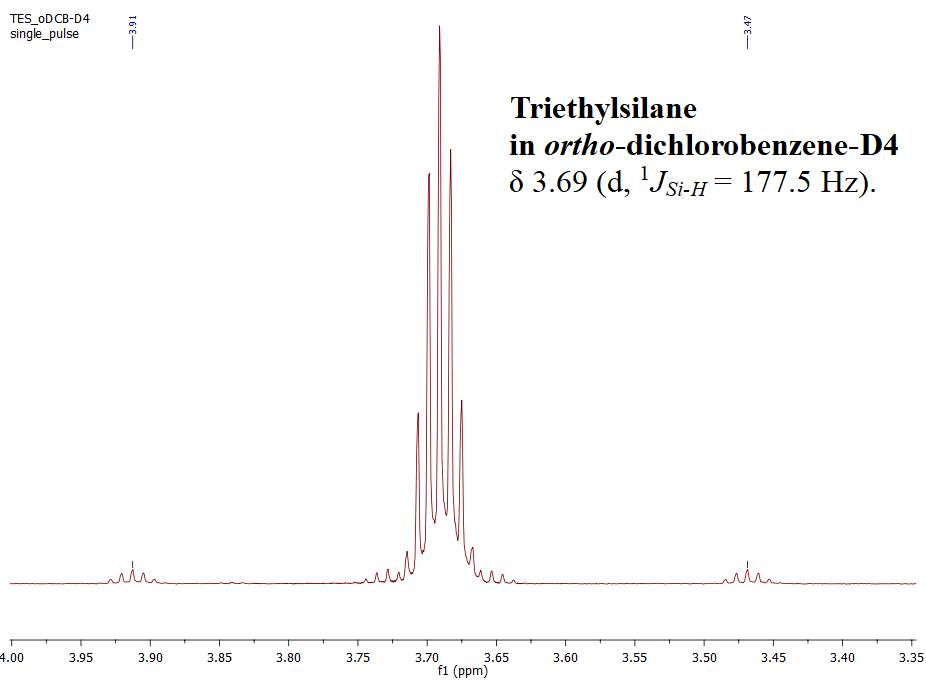

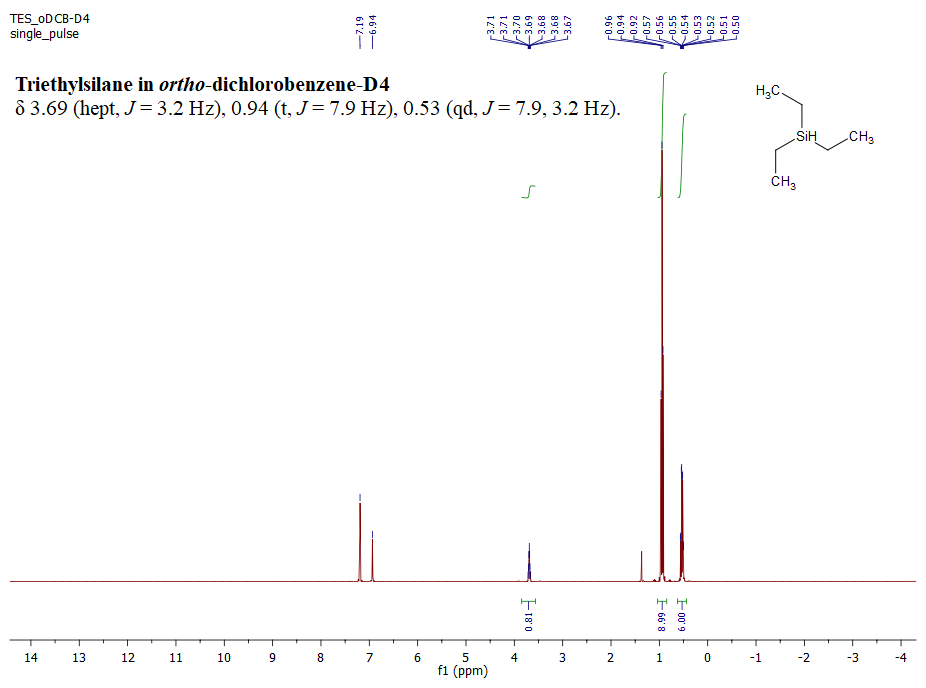


**Figure S7** 1H NMR spectrum of triethylsilane in oDCB-D4 with the magnified region of the Si‑H proton signal in the inset.


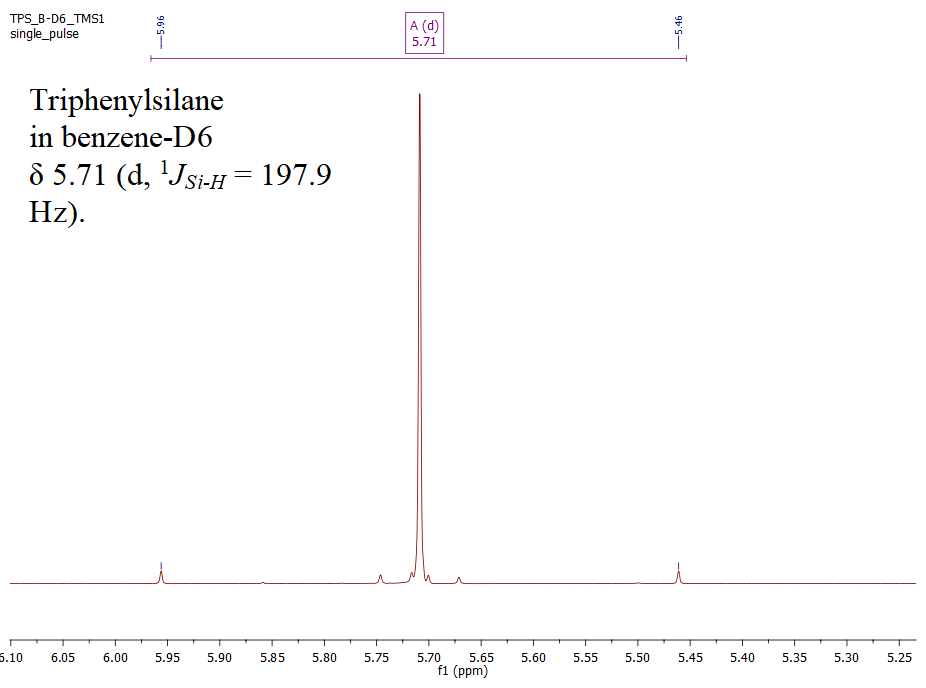

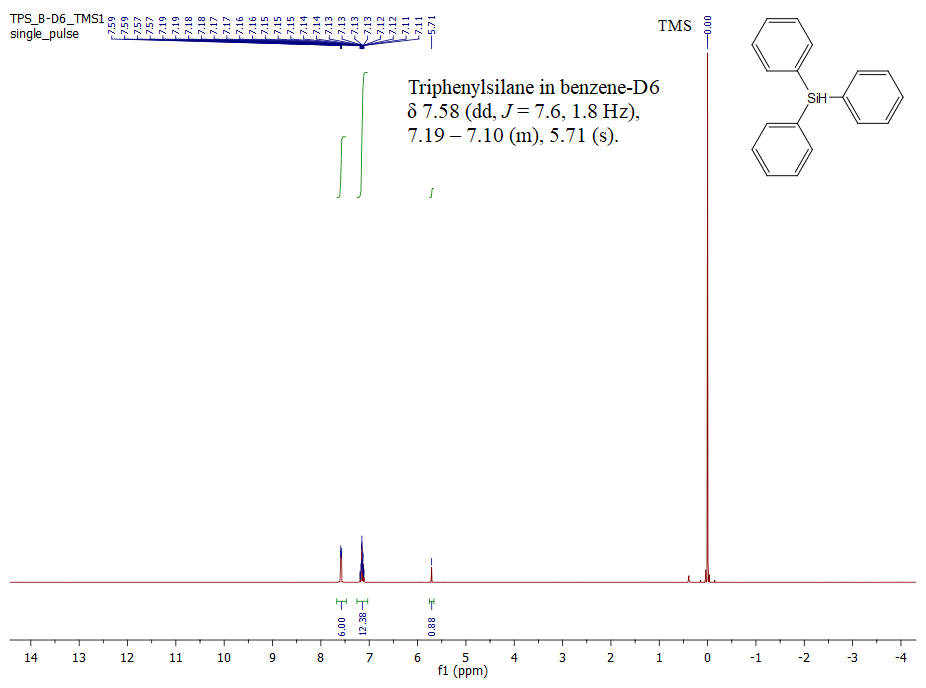


**Figure S8** 1H NMR spectrum of triphenylsilane in benzene-D6 with the magnified region of the Si‑H proton signal in the inset.


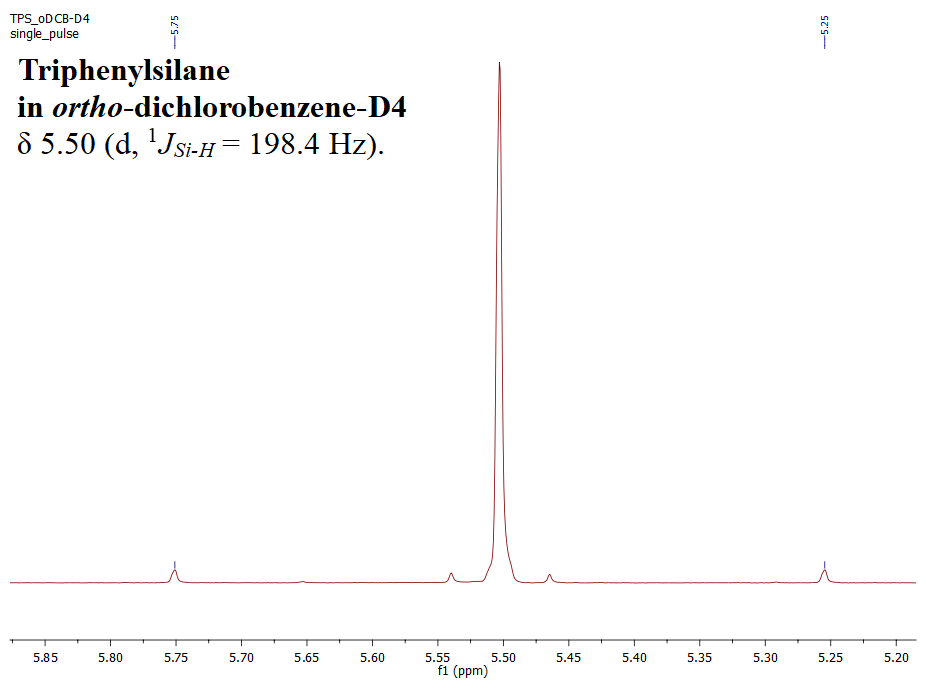

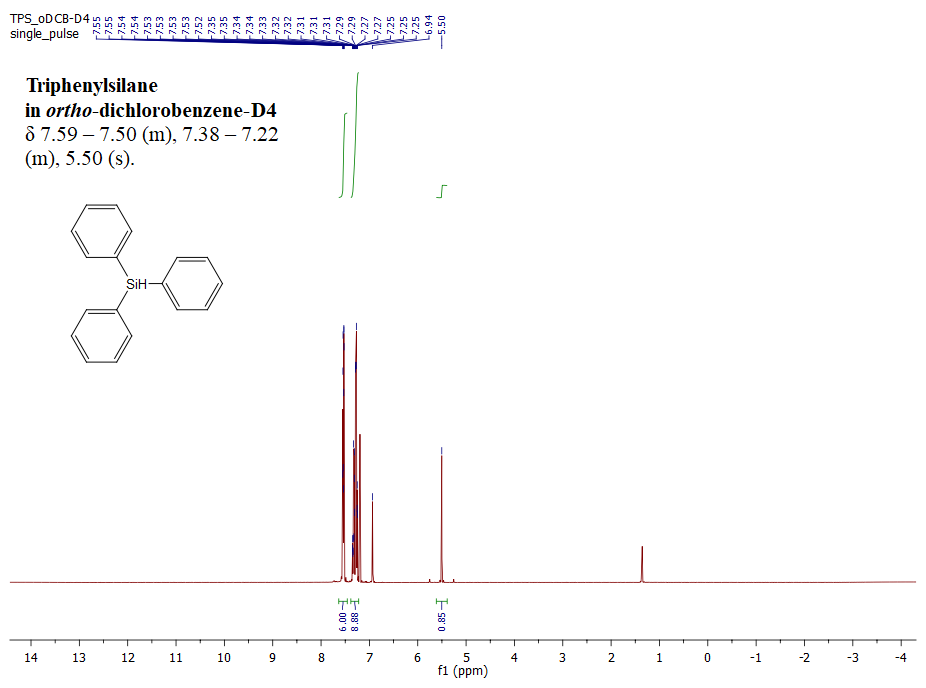


**Figure S9** 1H NMR spectrum of triphenylsilane in oDCB-D4 with the magnified region of the Si‑H proton signal in the inset.
